# Supplementary material for: Assessment of a 4-Week Starch- and Sucrose-Reduced Diet and Its Effects on Gastrointestinal Symptoms and Inflammatory Parameters among Patients with Irritable Bowel Syndrome
Source: MDPI journal article supplement (doi:10.3390/nu13020416), 2021-01-28

## Supplemental material

### Supplemental tables and figures

**Table S1.** Recommendations of fruit intake according to a starch- and sucrose- reduced diet

| Well tolerated | Tolerated by some | Not tolerated  |
|----------------|-------------------|----------------|
| Avocado        | Persimmons        | Apples         |
| Blackberries   | Plums             | Apricots       |
| Blueberries    | Raisins           | Bananas        |
| Boysenberries  | Watermelon        | Cantaloupe     |
| Cherries       |                   | Dates          |
| Cranberries    |                   | Grapefruit     |
| Currants       |                   | Guava          |
| Figs           |                   | Honeydew melon |
| Gooseberries   |                   | Mangos         |
| Grapes         |                   | Nectarines     |
| Kiwi           |                   | Oranges        |
| Lemons         |                   | Peaches        |
| Limes          |                   | Pineapple      |
| Loganberries   |                   | Tangelos       |
| Olives         |                   | Tangerines     |
| Papaya         |                   |                |
| Pears          |                   |                |
| Pomegranates   |                   |                |
| Prunes         |                   |                |
| Raspberries    |                   |                |
| Rhubarb        |                   |                |
| Strawberries   |                   |                |

## Supplemental material

**Table S2.** Recommendations of vegetable and legume intake according to a starch- and sucrose-reduced diet

| Well tolerated    | Tolerated by some | Not tolerated   |
|-------------------|-------------------|-----------------|
| Alfalfa sprouts   | Edamame soybeans  | Beets           |
| Artichokes*       | Jicamas           | Black beans     |
| Arugulas          | Leeks             | Black-eyed peas |
| Asparagus*        | Okra              | Butternut       |
| Bamboo shoots     | Pumpkin           | Carrots         |
| Bok choy          | Snow peas         | Cassava         |
| Broccoli*         | Tempeh            | Chickpeas       |
| Brussel sprouts*  | Tofu              | Corn            |
| Cabbage*          | Yellow wax beans  | Garlic          |
| Cauliflower*      |                   | Green peas      |
| Celery            |                   | Lentils         |
| Chard             |                   | Kidney beans    |
| Chicories         |                   | Lima beans      |
| Chives            |                   | Navy beans      |
| Collard greens    |                   | Onion           |
| Cress             |                   | Parsnips        |
| Cucumber          |                   | Pinto beans     |
| Eggplant          |                   | Potatoes        |
| Endive            |                   | Soybeans        |
| Green beans       |                   | Split peas      |
| Kale              |                   | Sweet potatoes  |
| Lettuce           |                   | Yams            |
| Mung bean sprouts |                   |                 |
| Mushrooms         |                   |                 |
| Mustard green     |                   |                 |
| Peppers           |                   |                 |
| Radishes          |                   |                 |
| Spaghetti squash  |                   |                 |
| Spinach           |                   |                 |
| Tomatoes          |                   |                 |
| Turnips           |                   |                 |
| Yellow squash     |                   |                 |
| Zucchini          |                   |                 |

\*excess intake can cause bloating/flatulence in all individuals

## Supplemental material

**Table S3.** Participant characteristics and physical activity at baseline

|                                   | <b>Intervention<br/>N=80*</b> |                               | <b>Control<br/>N=25**</b> |                               | <b><i>p</i></b> |
|-----------------------------------|-------------------------------|-------------------------------|---------------------------|-------------------------------|-----------------|
|                                   | <b>Median (IQR)</b>           | <b>No of participants (%)</b> | <b>Median (IQR)</b>       | <b>No of participants (%)</b> |                 |
| BMI (kg/m <sup>2</sup> )          | 24.7 (22.3-29.1)              |                               | 24.0 (22.4-26.6)          |                               | 0.23            |
| Sex (female/male)                 |                               | 60/20                         |                           | 22/3                          | 0.14            |
| <i>Physical activity per week</i> |                               |                               |                           |                               | 0.44            |
| None                              |                               | 9 (12)                        |                           | 2 (8)                         |                 |
| <30 min                           |                               | 19 (24)                       |                           | 5 (20)                        |                 |
| 30-60 min                         |                               | 12 (13)                       |                           | 4 (16)                        |                 |
| 60-120 min                        |                               | 20 (26)                       |                           | 6 (24)                        |                 |
| >120 min                          |                               | 18 (23)                       |                           | 8 (32)                        |                 |
| <i>Subgroups</i>                  |                               |                               |                           |                               | 0.26            |
| IBS-D                             |                               | 23 (30)                       |                           | 3 (12)                        |                 |
| IBS-M                             |                               | 29 (36)                       |                           | 8 (32)                        |                 |
| IBS-C                             |                               | 13 (17)                       |                           | 7 (28)                        |                 |
| Unspecified IBS                   |                               | 2 (3)                         |                           | 1 (4)                         |                 |
| Non-IBS FGID                      |                               | 11 (14)                       |                           | 6 (24)                        |                 |

IBS = irritable bowel syndrome, IBS-D = diarrhea-predominant IBS, IBS-M = mixed IBS, IBS-C = constipation-dominated IBS, FGID = functional gastrointestinal disease. IBS subgroup diagnosis based on Rome IV criteria [22]. BMI: 7 missing values (mv) for the intervention group and 2 mv for controls. IBS subgroups: 2 mv for the intervention group. Mann-Whitney U test and Fisher's exact test.  $P < 0.05$  was considered statistically significant.

## Supplemental material

**Table S4.** Comorbidity and drug treatment in the IBS patients

|                              | <b>Intervention<br/>N=80</b> | <b>Control<br/>N=25</b> | <b><i>p</i></b> |
|------------------------------|------------------------------|-------------------------|-----------------|
| <b><i>Diseases</i></b>       |                              |                         |                 |
| Allergy                      | 11                           | 6                       | 0.23            |
| Hypothyroid disease          | 8                            | 4                       | 0.47            |
| Asthma bronchialis           | 8                            | 3                       | 0.72            |
| Depression                   | 9                            | 2                       | 1.00            |
| Hypertension                 | 7                            | 3                       | 0.70            |
| Migraine                     | 7                            | 0                       | 0.19            |
|                              |                              |                         |                 |
| <b><i>Drug treatment</i></b> |                              |                         |                 |
| Antidepressants              | 13                           | 5                       | 0.43            |
| Levaxine                     | 9                            | 4                       | 0.50            |
| Laxatives                    | 10                           | 2                       | 0.42            |
| Proton pump inhibitor        | 9                            | 3                       | 0.58            |
| Vitamin D                    | 7                            | 4                       | 0.25            |
| Hormonal treatment           | 7                            | 2                       | 0.64            |
| Statins                      | 7                            | 1                       | 0.39            |
| Asthma inhalators            | 3                            | 3                       | 0.14            |
| Folic acid                   | 4                            | 2                       | 0.44            |
| Cobalamin                    | 3                            | 2                       | 0.34            |

The number of patients with irritable bowel syndrome (IBS) with concomitant disease and regular drug treatment during the study period. One patient could have several drugs within the same category. Fisher's exact test.  $P < 0.05$  was considered statistically significant.

## Supplemental material

**Table S5.** Vitamin intake at baseline and at the end of the 4 week-SSRD intervention

|                  | Intervention<br>N=80* |                         | Control<br>N=25** |                         |          | Intervention                  | Control                       |          |
|------------------|-----------------------|-------------------------|-------------------|-------------------------|----------|-------------------------------|-------------------------------|----------|
|                  | Median (IQR)          | % of<br>patients<br>≥AR | Median (IQR)      | % of<br>patients<br>≥AR | <i>p</i> | Median of<br>difference (IQR) | Median of<br>difference (IQR) | <i>p</i> |
| Vitamin A (µg)   |                       |                         |                   |                         |          | -11 (-41-28)                  | -1.5 (-24-32)                 | 0.53     |
| Baseline         | 510 (334-798)         |                         | 383 (262-541)     |                         | 0.14     |                               |                               |          |
| 4 weeks          | 443 (275-709)         |                         | 438 (251-646)     |                         | 0.67     |                               |                               |          |
| Vitamin D (µg)   |                       |                         |                   |                         |          | 0.7 (-0.9-4.1)                | 1.9 (-0.2-3.1)                | 0.46     |
| Baseline         | 3.5 (1.7-5.9)         | 16                      | 2.4 (1.8-4.1)     | 4                       | 0.13     |                               |                               |          |
| 4 weeks          | 4.7 (2.2-9.8)         | 30                      | 4.0 (2.8-5.7)     | 12                      | 0.50     |                               |                               |          |
| Vitamin E (mg)   |                       |                         |                   |                         |          | 36 (-40-111)                  | 3 (-54-86)                    | 0.21     |
| Baseline         | 9.7 (6.6-14)          |                         | 9.0 (5.6-13)      |                         | 0.30     |                               |                               |          |
| 4 weeks          | 13 (8.8-21)           |                         | 10 (6.2-14)       |                         | 0.06     |                               |                               |          |
| Thiamine (mg)    |                       |                         |                   |                         |          | -0.1 (-0.4-0.5)               | 0 (-0.5-0.2)                  | 0.52     |
| Baseline         | 1.0 (0.8-1.3)         | 63                      | 0.9 (0.6-1.3)     | 52                      | 0.18     |                               |                               |          |
| 4 weeks          | 1.0 (0.6-1.6)         | 41                      | 0.8 (0.6-1.2)     | 36                      | 0.26     |                               |                               |          |
| Riboflavin (mg)  |                       |                         |                   |                         |          | 0.1 (-0.3-0.5)                | 0.1 (-0.2-0.3)                | 0.84     |
| Baseline         | 1.3 (1.0-1.5)         | 55                      | 1.0 (0.8-1.5)     | 36                      | 0.09     |                               |                               |          |
| 4 weeks          | 1.4 (1.1-1.8)         | 61                      | 1.2 (0.8-1.6)     | 44                      | 0.10     |                               |                               |          |
| Niacin (mg)      |                       |                         |                   |                         |          | -1.0 (-8.2-9.0)               | -2.7 (-5.7-6.5)               | 0.90     |
| Baseline         | 16 (11-24)            | 63                      | 14 (10-20)        | 64                      | 0.31     |                               |                               |          |
| 4 weeks          | 17 (11-25)            | 63                      | 14 (11-23)        | 52                      | 0.51     |                               |                               |          |
| Vitamin B6 (mg)  |                       |                         |                   |                         |          | -0.1 (-0.6-0.5)               | 0 (-0.4-0.4)                  | 0.79     |
| Baseline         | 1.5 (1.2-2.0)         | 75                      | 1.4 (0.9-1.9)     | 64                      | 0.20     |                               |                               |          |
| 4 weeks          | 1.6 (1.0-2.0)         | 66                      | 1.4 (1.1-2.1)     | 68                      | 0.75     |                               |                               |          |
| Folate (µg)      |                       |                         |                   |                         |          | 44 (-71.5-126)                | 33 (-63-97)                   | 0.67     |
| Baseline         | 226 (171-296)         | 61                      | 238 (148-279)     | 56                      | 0.52     |                               |                               |          |
| 4 weeks          | 282 (193-417)         | 66                      | 229 (131-351)     | 52                      | 0.15     |                               |                               |          |
| Vitamin B12 (µg) |                       |                         |                   |                         |          | 0.7 (-1.2-3.4)                | 0 (-0.6-1.7)                  | 0.36     |
| Baseline         | 3.1 (2.1-4.9)         | 90                      | 2.4 (1.6-4.4)     | 84                      | 0.17     |                               |                               |          |
| 4 weeks          | 4.2 (2.8-6.9)         | 88                      | 3.0 (2.1-4.5)     | 76                      | 0.018    |                               |                               |          |
| Vitamin C (mg)   |                       |                         |                   |                         |          | 22 (-42-76)                   | 0.5 (-26-23)                  | 0.26     |
| Baseline         | 69 (28-106)           | 63                      | 54 (24-74)        | 52                      | 0.20     |                               |                               |          |
| 4 weeks          | 88 (31-144)           | 59                      | 47 (22-98)        | 40                      | 0.024    |                               |                               |          |

SSRD = starch- and sucrose-reduced diet. \*2 missing values (mv) at baseline and 6 mv at week 4. \*\*3 mv at 4 weeks. AR = average requirement [21]. Nutrient levels were calculated from a single day (day 2) of 4-day food diary registrations; before and at the end of the 4-week dietary intervention. Calculations were performed with the AIVO Diet computer program [20]. Values are presented as median and interquartile ranges (IQR). Comparisons between groups were performed by Mann-Whitney U test.  $P < 0.05$  was considered statistically significant.

## Supplemental material

**Table S6.** Mineral intake at baseline and at the end of the 4-week SSRD intervention

|                 | Intervention<br>N=80* |               | Control<br>N=25** |               |          | Intervention                  | Control                       |          |
|-----------------|-----------------------|---------------|-------------------|---------------|----------|-------------------------------|-------------------------------|----------|
| Variable        | Median (IQR)          | %<br>of<br>AR | Median (IQR)      | %<br>of<br>AI | <i>p</i> | Median of<br>difference (IQR) | Median of<br>difference (IQR) | <i>p</i> |
| Sodium (mg)     |                       |               |                   |               |          | -551 (-1463-240)              | -650 (-1467-456)              | 0.83     |
| Baseline        | 2419 (1886-3153)      |               | 2205 (1911-3282)  |               | 0.96     |                               |                               |          |
| 4 weeks         | 1866 (1215-2768)      |               | 2187 (1266-2650)  |               | 0.63     |                               |                               |          |
| Potassium (mg)  |                       |               |                   |               |          | -161 (-854-802)               | 45 (-907-514)                 | 0.73     |
| Baseline        | 2506 (2048-3243)      |               | 2435 (1782-3183)  |               | 0.83     |                               |                               |          |
| 4 weeks         | 2561 (1760-3168)      |               | 2466 (1715-3204)  |               | 0.80     |                               |                               |          |
| Phosphorus (mg) |                       |               |                   |               |          | 88 (-304-451)                 | -14 (-228-168)                | 0.31     |
| Baseline        | 1134 (941-1456)       | 96            | 981 (815-1386)    | 100           | 0.17     |                               |                               |          |
| 4 weeks         | 1301 (1017-1586)      | 93            | 1082 (821-1391)   | 88            | 0.08     |                               |                               |          |
| Calcium (mg)    |                       |               |                   |               |          | -20 (-272-307)                | -59 (-352-173)                | 0.61     |
| Baseline        | 759 (500-954)         | 74            | 685 (450-964)     | 68            | 0.72     |                               |                               |          |
| 4 weeks         | 796 (552-1021)        | 76            | 783 (386-1120)    | 60            | 0.64     |                               |                               |          |
| Iron (mg)       |                       |               |                   |               |          | -0.3 (-4.4-3.2)               | -0.3 (-1.4-1.8)               | 0.37     |
| Baseline        | 8.2 (6.1-11)          | 51            | 7.6 (4.6-9.0)     | 32            | 0.10     |                               |                               |          |
| 4 weeks         | 7.5 (5.8-10)          | 45            | 7.1 (5.5-9.3)     | 32            | 0.62     |                               |                               |          |
| Magnesium (mg)  |                       |               |                   |               |          | 9 (-102-111)                  | -2 (-79-71)                   | 0.99     |
| Baseline        | 261 (203-354)         |               | 253 (202-325)     |               | 0.40     |                               |                               |          |
| 4 weeks         | 284 (201-422)         |               | 280 (184-378)     |               | 0.56     |                               |                               |          |
| Zinc (mg)       |                       |               |                   |               |          | 0.9 (-1.8-2.9)                | 0.4 (-0.9-2)                  | 0.74     |
| Baseline        | 8.0 (6.3-9.9)         | 86            | 6.5 (5.4-9.1)     | 80            | 0.049    |                               |                               |          |
| 4 weeks         | 8.9 (6.8-11)          | 81            | 7.5 (6.0-10)      | 80            | 0.08     |                               |                               |          |
| Iodine (µg)     |                       |               |                   |               |          | -4 (-57-63)                   | 5.5 (-56-28)                  | 0.87     |
| Baseline        | 103 (77-143)          | 50            | 97 (53-141)       | 44            | 0.51     |                               |                               |          |
| 4 weeks         | 120 (72-157)          | 53            | 106 (83-138)      | 52            | 0.62     |                               |                               |          |
| Selenium ( µg)  |                       |               |                   |               |          | 11 (-7.6-32)                  | 4.5 (-7.2-21)                 | 0.35     |
| Baseline        | 34 (22-54)            | 56            | 27 (18-40)        | 40            | 0.16     |                               |                               |          |
| 4 weeks         | 47 (33-71)            | 71            | 33 (22-50)        | 52            | 0.026    |                               |                               |          |

SSRD = starch- and sucrose-reduced diet. \*2 missing values (mv) at baseline and 6 mv at week 4. \*\*3 mv at 4 weeks. AR = average intake [21]. AR for postmenopausal women were applied for all women > 50 years old. Nutrient levels were calculated from a single day (day 2) of 4-day food diary registrations; before and at the end of the 4-week dietary intervention. Calculations were performed with the AIVO Diet computer program [20]. Values are presented as median and interquartile ranges (IQR). Comparisons between groups were performed by Mann-Whitney U test.  $P < 0.05$  was considered statistically significant.

## Supplemental material

**Table S7.** Nutrient intakes and BMI in IBS and non-IBS controls

|                             | <b>IBS patients<br/>N=105</b> | <b>Non-IBS controls<br/>N=105</b> | <b><i>p</i></b> |
|-----------------------------|-------------------------------|-----------------------------------|-----------------|
|                             | <b>Median (IQR)</b>           | <b>Median (IQR)</b>               |                 |
| BMI (kg/m <sup>2</sup> )    | 24.5 (22.4-27.7)              | 22.6 (19.8-26.2)                  | <0.001          |
| Total energy (kJ)           | 6730 (5583-8658)              | 8005 (6573-10 034)                | 0.002           |
| <i>Nutrient intake (E%)</i> |                               |                                   |                 |
| Carbohydrates               | 43 (38-50)                    | 46 (42-50)                        | 0.15            |
| Total Fat                   | 35 (29-42)                    | 37 (33-41)                        | 0.24            |
| Protein                     | 16 (13-19)                    | 18 (15-20)                        | 0.017           |
| Starch                      | 19 (13-24)                    | 27 (23-32)                        | <0.001          |
| Monosaccharides             | 5.1 (3.5-7.7)                 | 5.8 (4.1-7.2)                     | 0.26            |
| Disaccharides               | 7.9 (6.3-11)                  | 11 (8.7-15)                       | <0.001          |

IBS = irritable bowel-syndrome, BMI = body mass index, kJ = kilojoule, E% = energy percentage. Missing values (mv) for energy intake and nutrients: 2 for IBS patients and 33 for non-IBS controls. BMI: 9 mv for IBS patients and 3 mv for non-IBS controls. Calculations were performed with the AIVO Diet computer program for IBS patients [20] and as previously described for controls from the Malmö Offspring Study [18]. Mann-Whitney U test.  $P < 0.05$  was considered statistically significant.

## Supplemental material

**Table S8.** Correlations between changes in gastrointestinal symptoms and nutrient levels

| <b>Change in variable<br/>(<math>\Delta</math>-value)</b> | <b>Total IBS-SSS</b>   | <b>Bloating and<br/>flatulence</b> | <b>Intestinal symptoms'<br/>influence on daily<br/>life</b> |
|-----------------------------------------------------------|------------------------|------------------------------------|-------------------------------------------------------------|
| <b>Sucrose</b>                                            | rs=0.225<br>p=0.029    | rs=0.131<br>p=0.21                 | rs=0.148<br>p=0.15                                          |
| <b>Monosaccharides</b>                                    | rs =0.110<br>p =0.29   | rs=0.024<br>p=0.82                 | rs=-0.009<br>p=0.93                                         |
| <b>Disaccharides</b>                                      | rs =0.291<br>p = 0.005 | rs=0.182<br>p=0.08                 | rs=0.224<br>p=0.029                                         |
| <b>Total sugar</b>                                        | rs =0.216<br>p =0.036  | rs=0.088<br>p=0.39                 | rs=0.104<br>p=0.32                                          |
| <b>Carbohydrates</b>                                      | r=0.123<br>p=0.001     | rs=0.219<br>p=0.033                | rs=0.250<br>p=0.014                                         |
| <b>Starch</b>                                             | r=0.063<br>p=0.001     | rs=0.204<br>p=0.047                | rs=0.152<br>p=0.14                                          |
| <b>Protein</b>                                            | r=-0.104<br>p=0.32     | r=0.011<br>p=0.92                  | rs=-0.081<br>p=0.44                                         |
| <b>Fat</b>                                                | r=-0.083<br>p=0.43     | r=0.001<br>p=0.10                  | rs=0.024<br>p=0.82                                          |
| <b>Fiber</b>                                              | r=0.134<br>p=0.20      | r=0.107<br>p=0.30                  | rs=0.080<br>p=0.44                                          |

N = 97 (with one missing value for all correlations). IBS-SSS = irritable bowel syndrome-symptom severity scale. For 'Bloating and flatulence' and 'Intestinal symptoms' influence on daily life' correlations there was one additional missing value for each, and for 'Total IBS-SSS' there were 2 additional missing values. Individual gastrointestinal (GI) symptoms were measured in mm on the visual analog scale for irritable bowel syndrome (VAS-IBS) [24]. Nutrient levels were calculated from a single day (day 2) of 4-day food diary registrations; before and at the end of the 4-week dietary intervention. Calculations were performed with the AIVO Diet computer program [20]. Pearson's or Spearman's correlation test.  $P < 0.05$  was considered statistically significant.



## Supplemental material

**Supplemental figure S1.** Flow chart over inclusion and exclusion criteria

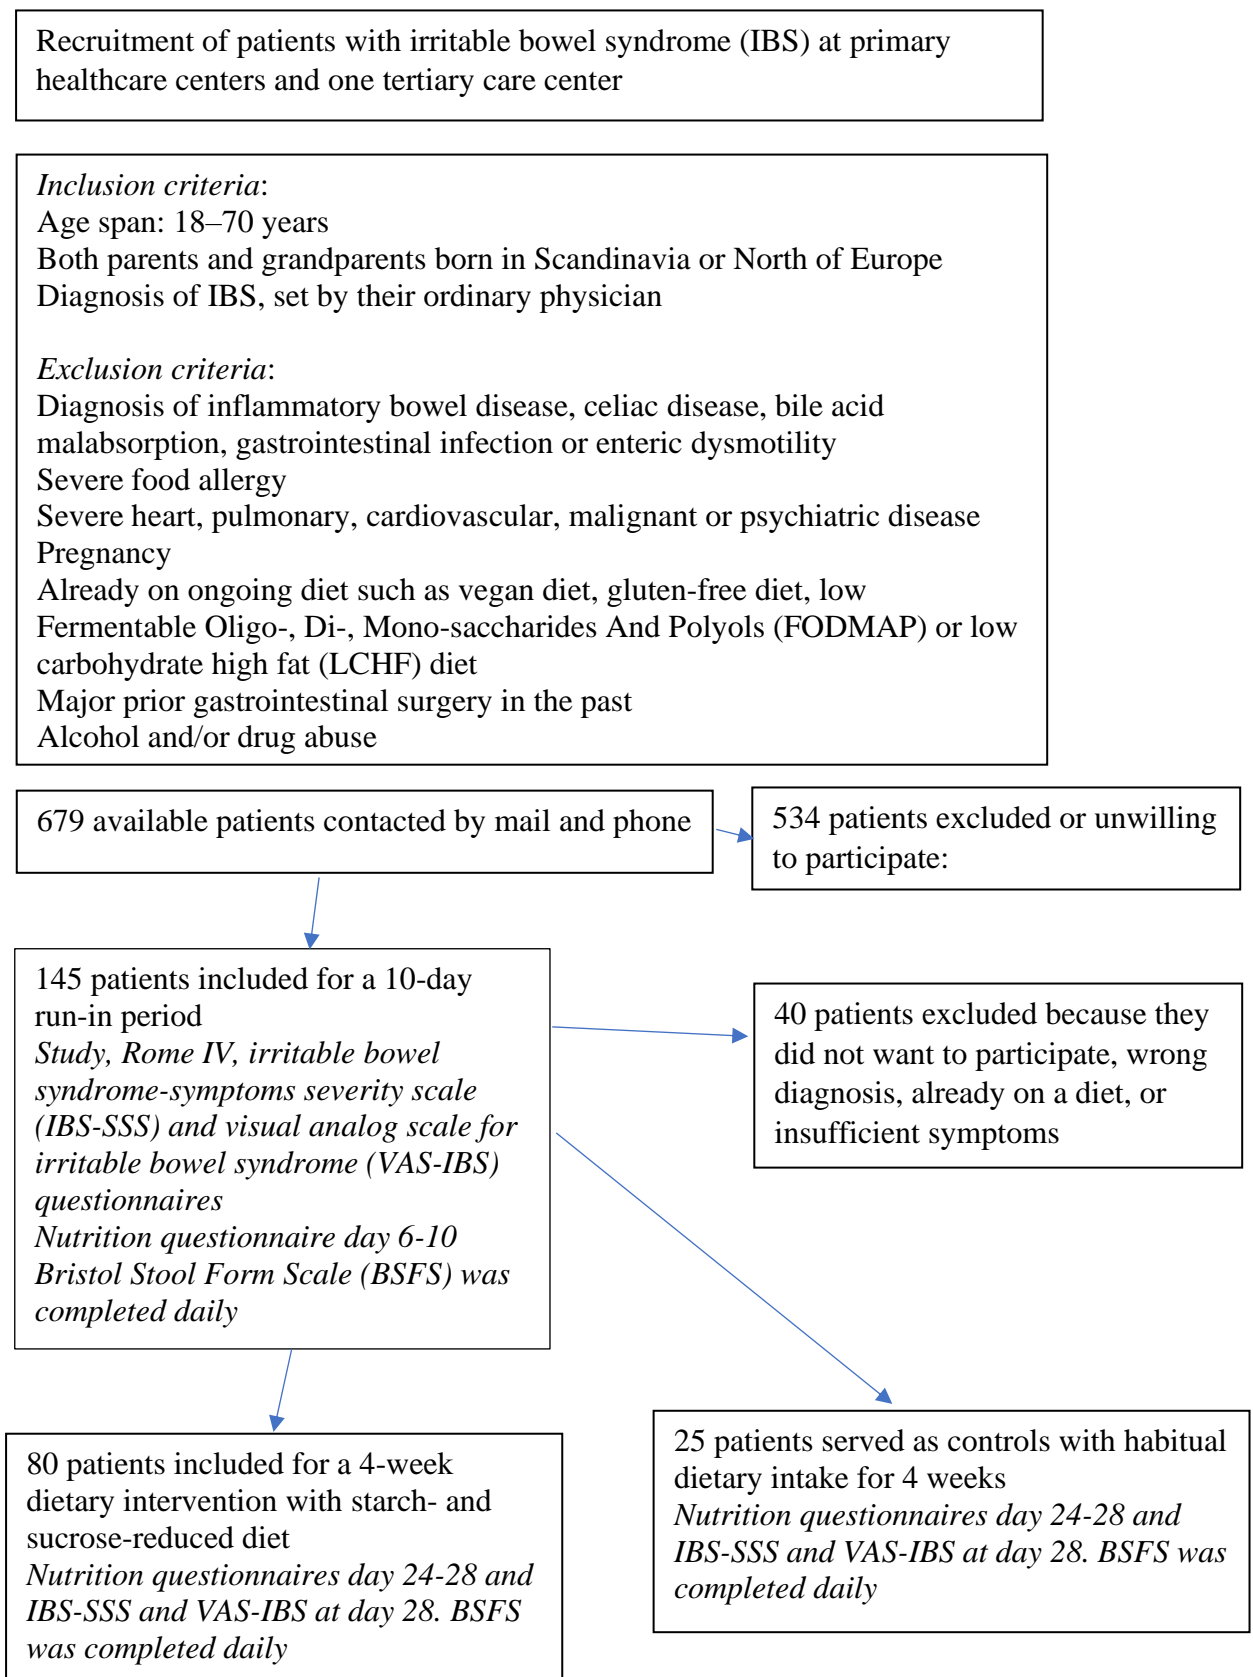

Supplement: s1 [file s1]
